# Supplementary material for: Predicting oral malodour based on the microbiota in saliva samples using a deep learning approach
Source: BMC Oral Health. 2018 Jul 31;18:128. doi: 10.1186/s12903-018-0591-6 (PMC6069980; doi:10.1186/s12903-018-0591-6)
Supplement: Supplementary file 1 — Dataset of numbers of OTUs in samples. A total of 3000 sequences were randomly extracted from each sequence data of a sample. The second column, “Malodour”, shows malodourous (P, positive) or normal (N, negative) breath. (CSV 24 kb) [file 12903_2018_591_MOESM1_ESM.csv]

Samples	Malodour	Cluster_3	Cluster_13	Cluster_14	Cluster_15	Cluster_16	Cluster_17	Cluster_18	Cluster_19	Cluster_20	Cluster_22	Cluster_23	Cluster_24	Cluster_25	Cluster_28	Cluster_30	Cluster_31	Cluster_33	Cluster_34	Cluster_40	Cluster_54	Cluster_55	Cluster_59	Cluster_67	Cluster_81	Cluster_85	Cluster_87	Cluster_88	Cluster_91	Cluster_99	Cluster_116	Cluster_134	Cluster_168	Cluster_175	Cluster_211	Cluster_225	Cluster_265	Cluster_271	Cluster_281	Cluster_337	Cluster_497	Cluster_558	Cluster_644	Cluster_2338	Cluster_2466	Cluster_2471	Cluster_2474	Cluster_2475	Cluster_2478
Ig9373	N	10	166	87	328	4	45	526	71	16	573	10	4	1	0	0	125	14	29	0	13	15	1	12	32	14	0	0	0	0	1	0	0	80	3	6	0	0	0	1	0	0	0	17	0	0	0	12	0
Ig9374	N	15	350	237	33	1	0	519	37	71	217	129	1	0	23	43	9	17	3	92	9	11	0	0	2	0	6	1	1	0	2	0	0	1	0	26	3	8	0	3	0	0	0	14	0	1	0	241	1
Ig9375	N	24	112	168	62	102	0	547	150	134	145	118	3	2	13	7	2	3	1	0	61	15	0	0	1	11	125	1	2	0	2	1	4	1	1	25	4	0	1	1	0	0	0	19	0	4	5	18	5
Ig9376	N	27	195	117	59	102	20	882	139	135	339	106	8	0	14	34	2	7	0	0	2	1	0	0	1	0	3	0	6	0	0	3	2	1	4	4	0	0	0	12	0	0	0	17	1	7	0	78	3
Ig9377	N	48	167	222	18	0	2	544	79	94	322	58	3	0	5	28	5	0	0	2	13	1	0	0	3	2	1	0	1	1	0	0	3	0	0	1	0	0	0	1	0	0	0	5	14	11	6	324	0
Ig9378	N	30	299	45	47	17	488	526	30	10	70	356	0	0	1	3	9	6	1	0	3	0	2	0	0	0	0	0	0	0	4	0	0	1	1	2	0	0	0	2	0	0	0	13	0	3	1	101	0
Ig9379	N	23	130	93	154	36	122	243	217	32	253	52	14	23	9	11	26	2	4	0	19	135	0	0	0	2	89	2	0	2	0	6	2	8	3	10	1	0	3	5	0	0	0	7	0	19	39	147	1
Ig9380	N	10	170	135	156	54	18	802	112	0	466	7	0	0	0	3	0	6	0	0	0	1	38	0	0	1	0	0	0	0	0	0	0	8	2	0	0	0	6	2	0	0	0	17	0	1	0	0	9
Ig9381	N	22	107	226	167	1	0	544	187	117	314	37	0	10	1	7	0	0	0	15	3	3	11	0	1	2	0	3	1	0	0	0	0	0	15	1	0	9	4	0	1	0	0	6	0	26	18	142	1
Ig9382	N	43	162	52	166	33	2	404	400	24	370	134	1	6	1	81	3	8	1	0	54	30	5	20	0	5	0	1	0	1	0	1	0	1	16	0	0	0	3	1	0	0	0	21	0	6	2	23	3
Ig9383	N	8	428	76	26	4	31	773	37	14	429	18	0	0	0	7	0	3	0	0	0	0	5	0	0	3	0	1	0	0	0	0	0	4	0	0	0	0	2	5	0	1	0	16	0	27	0	1	6
Ig9384	N	25	237	93	67	0	222	564	142	110	100	240	0	0	0	2	0	14	0	0	3	2	1	0	0	0	0	0	0	1	0	0	0	0	6	4	0	0	1	1	0	0	0	3	0	25	4	205	3
Ig9385	N	89	62	1	379	0	0	292	211	9	490	38	3	1	1	0	0	9	0	0	1	36	3	10	11	5	0	2	1	1	0	5	0	0	15	14	0	0	5	6	0	7	0	5	0	6	7	0	18
Ig9386	N	22	121	134	183	14	30	428	252	53	236	103	4	9	23	0	48	0	12	0	17	68	5	3	1	1	0	1	6	2	2	0	3	19	9	2	0	0	2	4	4	1	1	9	0	4	6	61	1
Ig9387	N	27	533	114	151	4	0	511	45	1	286	2	10	0	2	0	0	3	0	0	5	3	9	0	3	0	0	1	0	2	0	0	4	0	9	1	0	0	3	0	0	2	7	20	1	1	1	0	1
Ig9388	N	226	215	79	91	51	97	439	284	43	218	33	5	1	6	16	35	7	5	0	10	37	3	1	7	6	0	1	1	2	0	0	7	1	3	4	0	0	2	2	0	1	0	12	0	5	6	24	12
Ig9389	N	25	142	92	80	11	43	609	167	128	444	37	10	2	5	41	7	1	4	0	0	18	1	0	3	4	0	0	0	0	1	0	2	0	2	0	0	0	0	9	0	2	0	9	0	0	0	74	1
Ig9390	N	41	234	113	199	19	1	507	46	22	617	7	19	0	1	269	0	1	2	0	4	5	5	0	3	0	0	0	0	0	0	0	1	0	8	9	0	0	2	2	1	3	1	11	1	1	0	8	0
Ig9391	N	14	276	264	74	25	3	713	66	45	198	2	3	0	10	1	22	2	8	0	3	9	1	0	0	3	63	1	0	0	3	0	1	2	3	12	1	0	0	3	0	3	4	31	1	4	0	244	2
Ig9392	N	2	144	300	114	6	56	369	147	86	272	20	7	1	0	0	2	1	1	0	2	0	3	0	0	2	0	2	1	0	1	0	16	12	1	1	0	0	3	2	1	0	5	9	0	1	0	362	0
Ig9393	N	24	260	62	187	1	204	446	274	5	319	61	2	5	2	0	0	2	0	0	18	63	3	2	2	13	0	1	5	4	0	1	0	3	0	0	0	0	4	5	0	2	1	7	0	41	9	52	4
Ig9394	N	19	138	132	267	1	13	607	373	53	528	6	1	8	0	0	2	2	4	0	2	26	6	0	1	2	0	0	0	2	0	0	1	8	3	0	0	0	2	0	0	3	2	1	0	5	7	9	2
Ig9395	N	38	85	290	53	0	9	995	48	19	279	1	4	1	4	0	0	0	0	0	2	3	3	0	11	0	0	1	3	0	3	0	2	0	2	0	0	0	2	1	0	0	11	8	2	1	1	31	1
Ig9396	N	12	206	176	85	0	42	383	115	39	448	11	0	19	0	0	0	1	0	0	0	57	1	0	0	3	0	0	0	1	0	0	0	0	1	0	0	0	1	0	0	1	0	0	0	40	46	228	2
Ig9397	N	3	86	96	226	2	2	300	443	64	270	72	0	4	0	54	0	0	0	11	5	28	2	1	0	1	0	1	2	5	0	0	1	20	4	0	5	17	1	1	0	1	0	3	0	126	41	0	5
Ig9398	N	22	233	159	5	2	92	761	126	68	71	157	3	1	19	139	10	0	6	1	0	2	0	0	0	0	0	4	6	0	0	2	0	46	0	4	0	0	0	5	3	0	0	4	2	19	0	285	1
Ig9399	N	23	187	107	123	1	19	592	226	106	535	48	0	0	1	18	0	3	0	0	5	5	3	1	10	1	0	1	3	2	2	1	0	2	5	0	0	0	4	2	0	7	1	1	0	10	3	14	8
Ig9400	N	10	178	202	102	35	123	547	352	11	221	59	7	1	7	4	59	5	19	0	22	58	2	0	3	0	0	2	3	3	2	1	2	5	4	23	0	0	2	1	2	1	4	5	9	10	2	285	1
Ig9401	N	47	147	108	200	4	0	367	584	3	415	23	2	12	5	0	11	2	4	0	2	60	5	9	4	21	5	1	0	7	1	0	0	0	6	0	0	0	5	7	0	4	1	4	0	29	0	80	6
Ig9402	N	18	84	156	62	84	23	662	171	110	119	60	3	3	23	1	96	1	24	0	15	17	3	0	2	1	29	3	0	0	6	0	1	36	4	11	0	0	2	8	0	1	1	12	0	24	81	125	13
Ig9403	N	0	289	180	0	7	348	505	73	51	231	452	0	0	0	0	3	1	1	0	0	0	1	0	1	0	0	1	0	0	1	1	0	0	0	2	0	0	0	0	2	0	0	2	0	0	0	296	0
Ig9404	N	22	190	159	66	0	0	677	192	97	658	49	1	7	0	4	0	1	0	0	0	27	7	0	0	2	0	5	0	1	0	0	0	0	4	0	0	1	2	0	0	0	0	0	0	1	0	8	21
Ig9405	N	74	146	124	81	31	0	637	239	79	87	97	1	26	29	1	14	1	20	0	28	34	4	0	0	1	96	1	8	1	0	0	1	0	6	0	3	0	2	2	0	0	1	8	0	0	42	89	9
Ig9406	N	130	49	58	133	9	5	423	306	43	231	113	4	49	2	1	0	8	0	0	0	95	5	0	1	15	9	1	1	1	1	0	2	0	5	6	2	0	2	0	0	0	0	4	0	50	23	7	57
Ig9407	P	4	131	229	107	5	4	389	340	99	283	84	3	2	2	5	18	4	6	0	8	9	5	0	4	0	0	4	2	2	0	0	0	1	5	18	0	0	2	5	0	1	0	4	0	2	0	190	0
Ig9408	P	18	62	178	80	60	6	336	336	69	162	287	8	18	34	10	35	8	7	0	39	112	3	0	2	3	1	8	6	3	4	0	2	15	1	1	0	0	0	11	3	0	6	9	0	32	30	75	7
Ig9409	P	31	167	131	315	6	0	101	113	1	642	28	15	2	0	17	0	3	0	0	3	14	3	0	1	4	0	1	0	0	4	0	3	0	3	0	0	0	6	10	0	3	14	6	58	2	0	0	6
Ig9410	P	26	180	81	37	8	88	429	245	148	112	317	0	1	0	0	14	1	8	0	12	24	1	0	1	2	92	0	1	0	2	0	4	0	0	2	2	0	0	4	0	1	1	7	0	3	5	112	0
Ig9411	P	3	176	129	30	7	21	361	241	58	162	186	0	7	5	7	15	0	9	0	21	6	1	0	0	0	55	2	10	0	3	3	4	0	0	7	3	55	0	10	5	1	0	8	18	19	7	213	0
Ig9412	P	65	311	54	128	1	0	424	306	0	405	0	9	0	0	0	2	1	3	0	9	18	0	0	2	0	0	0	0	1	0	0	0	2	0	0	0	0	2	0	0	0	1	5	0	4	2	32	1
Ig9413	P	9	252	98	24	0	20	612	130	81	363	142	0	7	0	31	0	1	0	0	7	6	0	0	0	8	0	0	3	1	0	2	1	0	2	0	0	0	1	3	0	0	3	2	0	33	2	76	3
Ig9414	P	92	184	62	310	1	0	224	374	67	399	14	5	11	0	39	6	11	1	0	5	28	2	9	4	3	0	5	0	3	1	0	7	0	4	0	1	0	3	0	0	4	0	10	5	61	16	30	3
Ig9415	P	1	144	207	133	0	11	476	81	69	269	52	8	0	10	0	0	2	0	0	23	0	5	0	14	2	0	0	0	0	0	0	0	0	3	0	0	0	4	1	1	4	6	4	25	56	0	64	0
Ig9416	P	12	113	88	103	19	301	234	397	134	226	108	6	12	8	12	0	0	0	0	3	35	1	0	0	7	0	3	7	2	0	0	0	3	0	0	0	0	0	1	3	4	0	2	3	25	16	235	5
Ig9417	P	78	151	47	37	6	77	334	234	365	57	64	1	5	8	32	3	2	0	0	3	5	0	0	0	2	0	2	1	0	0	0	0	2	3	0	0	0	1	3	0	0	0	2	1	136	9	350	5
Ig9418	P	16	174	100	10	57	29	790	106	92	63	178	0	0	7	171	21	3	5	0	5	0	0	0	0	0	0	0	2	1	0	1	0	6	1	2	0	0	0	6	0	0	0	8	0	11	0	320	1
Ig9419	P	72	250	42	81	5	70	452	202	22	567	12	2	3	0	0	0	10	0	0	3	37	2	0	5	4	0	0	0	1	0	0	1	0	5	10	0	0	0	1	0	1	0	3	0	82	57	0	59
Ig9420	P	15	251	116	148	22	3	421	288	73	640	67	0	1	13	0	23	5	9	1	12	23	5	0	0	4	1	1	6	1	1	0	0	4	1	8	1	0	5	6	0	2	0	12	0	1	12	68	4
Ig9421	P	129	74	68	82	16	80	160	434	15	221	15	2	18	10	0	6	10	2	3	9	98	0	0	2	5	0	4	3	6	2	0	3	6	1	0	0	0	1	3	2	1	8	2	4	65	167	109	32
Ig9422	P	36	182	110	88	12	33	720	243	52	104	9	3	23	3	30	2	4	0	0	8	64	4	0	0	3	1	2	0	1	1	1	0	0	2	2	0	0	2	1	1	1	5	7	5	202	70	45	11
Ig9423	P	22	56	189	8	8	5	366	271	212	80	333	0	5	14	325	1	0	1	0	2	3	0	0	1	2	0	3	11	0	1	5	2	6	0	0	2	0	0	3	0	0	0	2	1	6	6	309	1
Ig9424	P	61	92	137	142	2	123	463	271	247	81	67	0	8	1	1	0	2	1	0	2	24	0	0	0	7	0	8	2	0	1	3	0	0	5	0	0	0	2	1	0	0	0	2	0	71	120	276	2
Ig9425	P	34	159	134	14	5	36	450	187	41	301	53	1	3	16	8	25	6	4	0	28	21	1	0	0	4	0	4	2	0	0	0	0	0	0	0	0	0	0	1	0	0	0	1	0	47	60	35	7
Ig9426	P	3	83	52	164	7	0	322	459	38	310	38	0	31	3	40	0	5	0	6	22	149	2	20	0	13	0	3	0	1	2	0	1	0	1	1	0	3	5	0	0	1	6	3	2	28	49	0	30
Ig9427	P	66	84	69	129	5	0	341	347	132	161	82	4	11	55	92	13	1	7	0	24	116	5	0	1	1	0	10	22	1	4	0	3	95	4	7	0	0	2	2	0	1	4	23	10	68	52	37	10
Ig9428	P	109	104	91	43	31	26	298	329	196	33	146	4	23	9	189	0	4	2	0	13	37	2	0	0	3	0	8	22	0	1	1	8	0	1	0	0	0	1	0	6	0	3	6	0	106	10	298	12
Ig9429	P	32	75	59	11	11	6	731	278	230	128	152	0	16	3	14	0	2	0	1	6	12	1	0	0	3	210	1	0	0	1	0	0	3	0	0	5	0	0	1	5	0	0	0	3	45	2	194	2
Ig9430	P	5	57	48	28	6	50	297	320	172	83	50	1	21	18	11	5	2	2	0	7	29	0	0	0	9	0	11	5	0	2	0	1	18	1	0	0	309	1	0	5	0	0	8	14	125	5	310	1
Ig9431	P	31	76	111	63	13	30	428	257	74	72	368	3	5	0	107	1	0	0	0	1	28	0	0	0	0	0	1	0	0	0	5	0	0	2	0	1	0	2	2	0	2	0	2	0	79	3	307	4
Ig9432	P	60	59	123	22	0	147	446	337	101	109	89	0	22	5	0	1	0	1	0	1	14	0	0	2	9	0	1	1	0	0	0	1	0	0	0	0	0	0	5	4	0	0	0	0	109	33	348	3
Ig9433	P	7	143	226	39	5	134	517	146	50	228	108	0	16	6	0	34	2	10	0	10	12	1	0	0	3	0	0	0	1	1	9	2	5	1	0	0	0	2	7	0	0	4	3	5	54	30	286	5
Ig9434	P	78	73	89	45	56	45	384	266	44	119	47	0	10	16	84	13	2	5	0	0	34	0	0	0	1	3	4	9	1	1	5	0	0	3	2	2	0	2	5	0	0	1	3	0	59	55	360	7
Ig9435	P	57	86	120	122	1	3	546	253	118	411	4	5	4	2	15	3	3	0	1	12	20	1	0	4	5	1	0	1	2	0	0	14	0	2	0	0	0	4	0	0	1	0	8	5	9	4	6	11
Ig9436	P	78	137	108	115	7	120	303	493	125	416	19	0	0	2	0	12	7	1	2	6	28	3	0	1	2	0	3	0	6	0	0	1	0	0	0	0	0	2	1	0	0	0	3	0	57	9	33	5
Ig9437	P	39	20	35	76	4	7	195	428	49	53	237	3	56	6	1	0	0	0	0	1	96	0	0	1	5	255	1	38	3	0	3	0	1	1	32	8	0	1	1	0	0	0	4	0	385	44	11	3
Ig9438	P	117	83	29	48	0	0	261	533	132	267	153	1	56	0	115	0	3	0	0	9	85	2	0	0	0	0	9	22	4	3	0	2	0	0	0	0	0	0	3	1	0	0	1	1	69	32	0	14
Ig9439	P	19	85	155	84	14	6	409	312	109	103	163	0	3	18	39	17	2	3	0	25	60	2	0	0	19	0	3	11	0	2	0	1	15	1	7	0	19	1	0	0	1	1	1	0	45	2	343	0
Ig9440	P	62	159	198	3	4	3	398	301	108	276	11	1	29	19	7	13	1	3	52	11	0	1	0	0	0	0	0	2	1	4	0	1	0	0	0	0	0	0	5	1	0	0	0	8	6	1	304	14
Ig9441	P	84	177	234	7	9	0	655	142	35	355	38	0	5	9	0	6	0	1	0	10	3	3	0	1	1	2	1	6	1	0	0	1	1	0	0	0	0	0	5	1	0	0	6	23	85	5	184	5
Ig9442	P	5	69	39	179	51	116	338	178	126	124	68	4	40	7	0	1	0	1	0	1	15	3	0	2	4	93	3	23	2	2	2	4	18	3	0	0	2	2	6	1	0	0	8	1	124	43	192	11
Ig9459	N	29	169	41	53	2	20	420	72	13	747	3	3	0	1	0	0	0	0	4	21	0	2	0	61	0	0	3	0	0	1	0	0	1	1	0	0	0	1	5	2	1	0	73	12	10	1	12	3
Ig9460	N	19	127	90	46	23	195	438	232	87	236	59	8	0	69	43	6	1	2	0	48	3	0	0	6	1	0	1	11	1	8	13	9	16	2	38	0	0	0	3	0	0	0	5	0	4	0	326	0
Ig9461	N	20	301	47	90	21	51	543	216	25	321	27	4	1	20	160	35	5	17	9	12	14	4	0	3	5	1	0	0	1	0	0	0	3	6	1	0	0	0	0	0	2	1	7	0	18	0	80	2
Ig9462	N	1	414	44	127	4	0	782	21	1	514	132	2	0	9	35	0	1	0	0	38	1	1	2	9	3	0	0	0	0	0	1	0	1	4	0	0	0	1	9	1	1	4	2	0	1	0	6	15
Ig9463	N	19	271	138	1	6	0	389	108	128	376	67	0	0	1	2	4	0	0	0	2	0	0	0	0	0	261	0	0	0	0	3	0	2	0	5	5	0	0	9	0	0	0	7	1	1	0	213	0
Ig9464	N	35	100	116	385	1	156	484	151	141	527	3	1	0	0	0	6	4	4	0	19	52	3	0	8	0	0	2	0	0	0	0	0	0	5	0	0	0	8	1	1	3	0	6	0	1	0	81	0
Ig9465	N	31	218	98	174	11	226	473	237	20	237	43	5	1	3	5	28	4	10	0	33	46	5	0	4	5	0	4	0	2	1	1	0	0	6	0	0	0	3	6	0	1	2	3	3	18	6	58	10
Ig9466	N	85	220	73	72	5	0	644	134	166	136	150	3	4	3	0	17	0	8	0	3	5	3	0	1	2	157	3	0	0	0	0	0	0	3	0	2	0	2	0	0	1	0	3	0	10	4	297	11
Ig9467	N	60	76	43	100	5	68	339	191	67	683	54	2	11	1	38	0	3	0	0	5	29	1	6	0	6	21	0	0	0	0	2	0	0	0	7	12	0	1	1	0	1	0	2	0	13	16	66	6
Ig9468	N	10	303	85	165	4	3	403	131	41	682	15	3	0	0	0	0	2	0	6	0	9	0	0	25	1	4	0	0	0	7	0	0	0	1	0	0	0	0	2	0	0	5	22	2	1	0	0	7
Ig9469	N	33	257	30	22	2	0	1099	120	59	156	7	17	0	8	1	0	1	0	0	1	1	3	0	15	0	62	0	0	0	0	0	0	0	0	1	1	0	3	0	0	1	19	14	1	9	0	0	5
Ig9470	P	18	179	87	34	8	12	410	225	21	262	37	6	0	24	1	0	3	0	6	21	21	2	0	1	1	28	2	1	1	0	2	2	0	2	12	2	0	0	5	2	0	0	7	3	92	3	175	4
Ig9471	P	29	192	129	7	6	64	550	226	98	197	37	2	4	6	1	0	7	0	0	3	9	0	0	0	9	11	2	1	0	0	15	5	5	0	0	2	0	1	4	4	0	0	6	6	7	12	318	10
Ig9472	P	49	129	141	179	0	47	256	157	96	219	35	5	4	0	0	0	2	0	0	0	220	1	0	5	11	0	4	3	0	3	0	13	0	4	0	0	0	0	1	0	1	4	1	2	16	138	47	1
Ig9473	P	19	177	81	205	19	38	432	296	168	192	41	1	1	3	21	25	8	8	0	0	3	4	0	1	0	5	2	7	0	0	1	0	5	6	1	0	0	2	6	0	3	0	7	0	7	0	208	5
Ig9474	P	96	157	51	29	70	20	661	265	129	176	101	3	5	0	234	0	1	0	0	0	3	5	0	0	1	0	6	0	1	0	1	1	1	3	2	0	0	0	4	0	0	0	9	0	7	0	139	6
Ig9475	P	23	168	43	80	29	48	714	144	227	266	5	0	0	0	54	0	2	0	0	0	2	0	0	5	1	0	17	0	0	0	2	1	6	7	6	0	0	1	0	0	1	5	8	0	157	6	34	16
Ig9476	P	24	134	59	41	32	288	199	189	70	526	45	2	0	3	0	58	2	15	0	3	11	0	0	0	0	0	4	75	0	1	0	0	23	0	0	0	0	0	7	4	0	0	1	0	40	8	312	9
Ig9477	P	14	161	136	79	11	56	815	107	141	94	47	1	0	8	13	18	2	5	0	11	2	3	0	0	2	1	1	0	0	0	4	1	0	4	3	0	0	0	1	1	2	0	6	0	15	4	304	4
Ig9478	P	33	111	73	86	15	5	474	232	20	214	94	1	3	0	257	6	2	0	0	41	25	2	0	1	7	0	2	1	1	0	0	0	0	0	4	0	0	0	1	6	1	1	1	1	32	20	141	3
[truncated: 60 more columns]
